# Supplementary material for: Population Pharmacokinetics, Exposure-Response, and Probability of Target Attainment Analyses for Tedizolid in Adolescent Patients with Acute Bacterial Skin and Skin Structure Infections
Source: PubMed Central journal article supplement (PMC8597753; doi:10.1128/aac.00895-21), 2021-11-17

## APPENDIX

### SUPPLEMENTARY INFORMATION

**Table A1.** Summary statistics of categorical covariates by trial

**Table A2.** Analysis data set: summary statistics of continuous covariates by trial

**Table A3.** Distribution of PK samples stratified by route of administration and age

**FIG. A1.** Goodness-of-fit plots. CWRES, conditional weighted residuals; DV, dependent variable; IPRED, individual predicted concentration; IWRES, individual weighted residuals; PRED, population model predictions; TSLD, time since last dose.

**FIG. A2.** Prediction-corrected VPC of the final model for all trials.

Note: Within each panel, the median (bold line) and 5<sup>th</sup> and 95<sup>th</sup> percentiles (dashed lines) of the observed data are compared to the 95% confidence intervals (shaded areas) for the median (dark area) and 5<sup>th</sup> and 95<sup>th</sup> percentiles of the simulated ( $n = 500$ ) data (light areas). Individual observations ( $n = 9,756$ ) are not shown for clarity.

VPC, visual predictive check.

<sup>a</sup>Oral and IV administration or IV to oral switch permitted.

<sup>b</sup>Oral administration only.

**FIG. A3.** Comparison of body weight distribution between simulated and actual adolescent participants.

Note: The simulated data were sampled from the National Health and Nutrition Examination Survey data set in participants 12 to <18

years of age; the observed data are participants in the phase 3 adolescent trial. The box is delimited by the 25th, 50th, and 75th percentiles; the whiskers extend to the lowest and largest values but no further than 1.5 times the interquartile range from the hinge. The dots beyond the whiskers are outliers and are represented individually.

$n$ , number of participants.

**FIG. A4.** Box plots of popPK model predicted AUC after last dose in adolescent (study PN012) and adult participants with ABSSSIs.

Note: The adult population includes participants with ABSSSIs >18 years old receiving 200 mg of tedizolid phosphate from previous Phase 2 and 3 studies. The boxes are delimited by the 25th, 50th, and 75th percentiles; the whiskers extend to the lowest and largest values but no further than 1.5 times interquartile range from the hinge. The dots beyond the whiskers are outliers and are represented individually.

ABSSSI, acute bacterial skin and skin structure infection; AUC, area under the concentration-time curve;  $AUC_{0-24h\_last}$ , area under the concentration-time curve from 0 to 24 hours on the last dosing day; popPK, population pharmacokinetics.

**Table A1. Summary statistics of categorical covariates by trial**

| <b>Covariate</b>      | <b>Trial<br/>PN013<br/>(n = 21)</b> | <b>Trial<br/>PN007<br/>(n = 175)</b> | <b>Trial<br/>PN008<br/>(n = 61)</b> | <b>Trial<br/>PN028<br/>(n = 28)</b> | <b>Trial<br/>PN026<br/>(n = 20)</b> | <b>Trial<br/>PN009<br/>(n = 328)</b> | <b>Trial<br/>PN010<br/>(n = 320)</b> | <b>Trial<br/>PN027<br/>(n = 20)</b> | <b>Trial<br/>PN012<br/>(n = 91)</b> |
|-----------------------|-------------------------------------|--------------------------------------|-------------------------------------|-------------------------------------|-------------------------------------|--------------------------------------|--------------------------------------|-------------------------------------|-------------------------------------|
| Sex                   |                                     |                                      |                                     |                                     |                                     |                                      |                                      |                                     |                                     |
| Male                  | 15 (71.4)                           | 115 (65.7)                           | 44 (72.1)                           | 14 (50.0)                           | 16 (80.0)                           | 201 (61.3)                           | 218 (68.1)                           | 17 (85.0)                           | 58 (63.7)                           |
| Female                | 6 (28.6)                            | 60 (34.3)                            | 17 (27.9)                           | 14 (50.0)                           | 4 (20.0)                            | 127 (38.7)                           | 102 (31.9)                           | 3 (15.0)                            | 33 (36.3)                           |
| Race                  |                                     |                                      |                                     |                                     |                                     |                                      |                                      |                                     |                                     |
| White                 | 16 (76.2)                           | 132 (75.4)                           | 50 (82.0)                           | 28 (100.0)                          | 17 (85.0)                           | 277 (84.5)                           | 278 (86.9)                           | 15 (75.0)                           | 80 (87.9)                           |
| Asian                 | —                                   | 1 (0.6)                              | —                                   | —                                   | 1 (5.0)                             | 2 (0.6)                              | 4 (1.2)                              | —                                   | —                                   |
| Black                 | 4 (19.0)                            | 40 (22.9)                            | 9 (14.8)                            | —                                   | 1 (5.0)                             | 38 (11.6)                            | 34 (10.6)                            | 5 (25.0)                            | 11 (12.1)                           |
| Other                 | 1 (4.8)                             | 2 (1.1)                              | 2 (3.3)                             | —                                   | 1 (5.0)                             | 11 (3.4)                             | 4 (1.2)                              | —                                   | —                                   |
| Participant condition |                                     |                                      |                                     |                                     |                                     |                                      |                                      |                                     |                                     |
| Healthy volunteer     | —                                   | —                                    | 61 (100.0)                          | 28 (100.0)                          | —                                   | —                                    | —                                    | 20 (100.0)                          | —                                   |
| ABSSSI                | —                                   | 175 (100.0)                          | —                                   | —                                   | —                                   | 328 (100.0)                          | 320 (100.0)                          | —                                   | 91 (100.0)                          |
| Hospitalized          | 21 (100.0)                          | —                                    | —                                   | —                                   | 20 (100.0)                          | —                                    | —                                    | —                                   | —                                   |
| Diabetic status       |                                     |                                      |                                     |                                     |                                     |                                      |                                      |                                     |                                     |
| Nondiabetic           | 21 (100.0)                          | —                                    | 61 (100.0)                          | 28 (100.0)                          | 20 (100.0)                          | 302 (92.0)                           | 288 (90.0)                           | 20 (100.0)                          | 91 (100.0)                          |
| Diabetic              | —                                   | —                                    | —                                   | —                                   | —                                   | 26 (7.9)                             | 31 (9.69)                            | —                                   | —                                   |
| Missing               | —                                   | 175 (100.0)                          | —                                   | —                                   | —                                   | —                                    | 1 (0.31)                             | —                                   | —                                   |

  

| <b>Covariate</b>      | <b>Trial<br/>PN031<br/>(n = 24)</b> | <b>Trial<br/>PN001<br/>(n = 32)</b> | <b>Trial<br/>PN005<br/>(n = 83)</b> | <b>Trial<br/>BAY-16101<br/>(n = 26)</b> | <b>Trial<br/>BAY-16102<br/>(n = 16)</b> | <b>Trial<br/>PN006<br/>(n = 51)</b> | <b>Trial<br/>BAY-16411<br/>(n = 16)</b> | <b>Overall<br/>(N = 1,312)</b> |
|-----------------------|-------------------------------------|-------------------------------------|-------------------------------------|-----------------------------------------|-----------------------------------------|-------------------------------------|-----------------------------------------|--------------------------------|
| Sex                   |                                     |                                     |                                     |                                         |                                         |                                     |                                         |                                |
| Male                  | 15 (62.5)                           | 24 (75.0)                           | 54 (65.1)                           | 26 (100.0)                              | 16 (100.0)                              | 35 (68.6)                           | 16 (100.0)                              | 884 (67.4)                     |
| Female                | 9 (37.5)                            | 8 (25.0)                            | 29 (34.9)                           | —                                       | —                                       | 16 (31.4)                           | —                                       | 428 (32.6)                     |
| Race                  |                                     |                                     |                                     |                                         |                                         |                                     |                                         |                                |
| White                 | 11 (45.8)                           | 26 (81.2)                           | —                                   | —                                       | —                                       | —                                   | —                                       | 930 (70.9)                     |
| Asian                 | —                                   | —                                   | 83 (100.0)                          | 26 (100.0)                              | 16 (100.0)                              | 51 (100.0)                          | 16 (100.0)                              | 200 (15.2)                     |
| Black                 | 12 (50.0)                           | 5 (15.6)                            | —                                   | —                                       | —                                       | —                                   | —                                       | 159 (12.1)                     |
| Other                 | 1 (4.2)                             | 1 (3.1)                             | —                                   | —                                       | —                                       | —                                   | —                                       | 23 (1.8)                       |
| Participant condition |                                     |                                     |                                     |                                         |                                         |                                     |                                         |                                |
| Healthy volunteer     | 24 (100.0)                          | 32 (100.0)                          | —                                   | 26 (100.0)                              | 16 (100.0)                              | —                                   | 16 (100.0)                              | 223 (17.0)                     |
| ABSSSI                | —                                   | —                                   | 83 (100.0)                          | —                                       | —                                       | 51 (100.0)                          | —                                       | 1,048 (79.9)                   |
| Hospitalized          | —                                   | —                                   | —                                   | —                                       | —                                       | —                                   | —                                       | 41 (3.1)                       |
| Diabetic status       |                                     |                                     |                                     |                                         |                                         |                                     |                                         |                                |
| Nondiabetic           | —                                   | —                                   | 46 (55.4)                           | 26 (100.0)                              | 16 (100.0)                              | 44 (86.3)                           | 16 (100.0)                              | 979 (74.6)                     |
| Diabetic              | —                                   | —                                   | 37 (44.6)                           | —                                       | —                                       | 7 (13.7)                            | —                                       | 101 (7.7)                      |
| Missing <sup>a</sup>  | 24 (100.0)                          | 32 (100.0)                          | —                                   | —                                       | —                                       | —                                   | —                                       | 232 (17.7)                     |

ABSSSI, acute bacterial skin and skin structure infection; *n*, number of participants.

<sup>a</sup>If diabetic status was missing in a given study, the value was set to missing (value of -99).

Note: Trial 13 corresponds to PN013, Trial 111 corresponds to PN026, and Trial 122 corresponds to PN012.

**Table A2. Analysis data set: summary statistics of continuous covariates by trial**

| <b>Covariate</b>       | <b>Trial<br/>PN013<br/>(n = 21)</b> | <b>Trial<br/>PN007<br/>(n = 175)</b> | <b>Trial<br/>PN008<br/>(n = 61)</b> | <b>Trial<br/>PN028<br/>(n = 28)</b>     | <b>Trial<br/>PN026<br/>(n = 20)</b>     | <b>Trial<br/>PN009<br/>(n = 328)</b> | <b>Trial<br/>PN010<br/>(n = 320)</b>    | <b>Trial<br/>PN027<br/>(n = 20)</b> | <b>Trial<br/>PN012<br/>(n = 91)</b> |
|------------------------|-------------------------------------|--------------------------------------|-------------------------------------|-----------------------------------------|-----------------------------------------|--------------------------------------|-----------------------------------------|-------------------------------------|-------------------------------------|
| Age, y                 |                                     |                                      |                                     |                                         |                                         |                                      |                                         |                                     |                                     |
| Mean (SD)              | 6.95 (2.40)                         | 36.2 (12.2)                          | 28.6 (8.39)                         | 52.8 (20.4)                             | 14.4 (1.69)                             | 43.7 (15.0)                          | 46.0 (15.8)                             | 28.1 (8.57)                         | 15.0 (1.75)                         |
| Median (min,<br>max)   | 7.00<br>(3.00, 11.0)                | 35.0<br>(18.0, 68.0)                 | 26.0<br>(18.0, 48.0)                | 55.5<br>(25.0, 78.0)                    | 14.0<br>(11.0, 17.0)                    | 43.5<br>(18.0, 86.0)                 | 46.0<br>(17.0, 86.0)                    | 25.0<br>(20.0, 50.0)                | 15.0<br>(12.0, 18.0)                |
| Weight, kg             |                                     |                                      |                                     |                                         |                                         |                                      |                                         |                                     |                                     |
| Mean (SD)              | 26.0 (9.06)                         | 81.6 (14.5)                          | 76.3 (12.4)                         | 79.2 (14.3)                             | 60.1 (12.6)                             | 82.3 (18.3)                          | 84.0 (24.4)                             | 82.4 (12.5)                         | 59.7 (17.3)                         |
| Median (min,<br>max)   | 26.9<br>(12.6, 42.3)                | 80.0<br>(47.0, 118)                  | 76.1<br>(48.9, 111)                 | 79.7<br>(58.5, 112)                     | 63.5<br>(38.5, 83.1)                    | 80.3<br>(47.7, 138)                  | 79.8<br>(40.5, 226)                     | 82.8<br>(55.3, 106)                 | 56.6<br>(27.6, 126)                 |
| BMI, kg/m <sup>2</sup> |                                     |                                      |                                     |                                         |                                         |                                      |                                         |                                     |                                     |
| Mean (SD)              | 16.3 (2.30)                         | 27.0 (4.37)                          | 25.2 (2.90)                         | 27.7 (3.26)                             | 21.9 (3.41)                             | 27.9 (5.34)                          | 28.5 (7.85)                             | 26.8 (3.31)                         | 21.9 (4.84)                         |
| Median (min,<br>max)   | 15.8<br>(12.7, 21.0)                | 26.7<br>(18.5, 36.0)                 | 25.5<br>(19.8, 31.5)                | 27.5<br>(22.0, 33.6)                    | 22.5<br>(16.0, 28.4)                    | 27.4<br>(16.0, 40.0)                 | 26.9<br>(15.6, 69.9)                    | 26.3<br>(20.9, 33.4)                | 20.8<br>(14.2, 45.0)                |
| <b>Covariate</b>       | <b>Trial<br/>PN031<br/>(n = 24)</b> | <b>Trial<br/>PN001<br/>(n = 32)</b>  | <b>Trial<br/>PN005<br/>(n = 83)</b> | <b>Trial<br/>BAY-16101<br/>(n = 26)</b> | <b>Trial<br/>BAY-16102<br/>(n = 16)</b> | <b>Trial<br/>PN006<br/>(n = 51)</b>  | <b>Trial<br/>BAY-16411<br/>(n = 16)</b> | <b>Overall<br/>(N = 1,312)</b>      |                                     |
| Age, y                 |                                     |                                      |                                     |                                         |                                         |                                      |                                         |                                     |                                     |
| Mean (SD)              | 56.4 (9.34)                         | 54.4 (6.98)                          | 63.2 (16.5)                         | 26.9 (4.94)                             | 27.8 (5.09)                             | 48.2 (17.7)                          | 26.2 (5.28)                             | 40.7 (18.2)                         |                                     |
| Median (min,<br>max)   | 59.0<br>(40.0, 74.0)                | 53.5<br>(39.0, 67.0)                 | 67.0<br>(25.0, 94.0)                | 26.0<br>(21.0, 37.0)                    | 27.0<br>(21.0, 35.0)                    | 49.0<br>(18.0, 79.0)                 | 25.5<br>(19.0, 36.0)                    | 40.0<br>(3.00, 94.0)                |                                     |
| Weight, kg             |                                     |                                      |                                     |                                         |                                         |                                      |                                         |                                     |                                     |
| Mean (SD)              | 83.8 (19.1)                         | 94.1 (19.9)                          | 67.5 (14.8)                         | 64.2 (6.88)                             | 63.2 (7.07)                             | 70.5 (15.3)                          | 62.2 (7.98)                             | 77.6 (21.2)                         |                                     |
| Median (min,<br>max)   | 78.8<br>(49.7, 125)                 | 97.3<br>(58.6, 151)                  | 67.0<br>(38.8, 109)                 | 64.3<br>(53.5, 78.2)                    | 62.9<br>(50.5, 75.4)                    | 68.0<br>(47.0, 111)                  | 62.2<br>(49.7, 76.6)                    | 76.0<br>(12.6, 226)                 |                                     |
| BMI, kg/m <sup>2</sup> |                                     |                                      |                                     |                                         |                                         |                                      |                                         |                                     |                                     |
| Mean (SD)              | 28.5 (4.73)                         | 31.0 (4.90)                          | 25.8 (5.19)                         | 21.6 (2.05)                             | 21.2 (2.36)                             | 25.1 (4.16)                          | 22.1 (1.87)                             | 26.6 (6.12)                         |                                     |
| Median (min,<br>max)   | 27.7<br>(21.0, 39.6)                | 31.5<br>(21.0, 38.9)                 | 25.0<br>(16.9, 47.9)                | 21.4<br>(18.3, 25.5)                    | 20.5<br>(18.3, 25.1)                    | 24.7<br>(18.4, 35.9)                 | 22.5<br>(19.4, 24.7)                    | 25.8<br>(12.7, 69.9)                |                                     |

BMI, body mass index; max, maximum; min, minimum; SD, standard deviation.

**Table A3. Distribution of PK samples stratified by route of administration and age**

| Study     | Oral Administration |             | Intravenous Administration |             | Number of Evaluable PK Observations <sup>a</sup> |                  |
|-----------|---------------------|-------------|----------------------------|-------------|--------------------------------------------------|------------------|
|           | PK Samples          | BLQ Samples | PK Samples                 | BLQ Samples | Adult ≥18 y                                      | Pediatric <18 y  |
| PN013     | 48                  | -           | 105                        | -           | -                                                | 153 <sup>b</sup> |
| PN007     | 1,153               | -           | -                          | -           | 1,153                                            | -                |
| PN008     | 93                  | -           | 1,251                      | -           | 1,344                                            | -                |
| PN028     | 385                 | -           | -                          | -           | 385                                              | -                |
| PN026     | 70                  | 10          | 77                         | 10          | -                                                | 147 <sup>b</sup> |
| PN009     | 1,169               | -           | -                          | -           | 1,169                                            | -                |
| PN010     | 570                 | -           | 646                        | -           | 1,213                                            | 3                |
| PN027     | 220                 | -           | -                          | -           | 220                                              | -                |
| PN012     | 80                  | 5           | 350                        | 3           | 30                                               | 400 <sup>b</sup> |
| PN031     | -                   | -           | 534                        | -           | 534                                              | -                |
| PN001     | 481                 | -           | -                          | -           | 481                                              | -                |
| PN005     | 73                  | -           | 353                        | -           | 426                                              | -                |
| BAY-16101 | 87                  | -           | 408                        | -           | 495                                              | -                |
| BAY-16102 | 228                 | -           | 280                        | -           | 508                                              | -                |
| PN006     | 37                  | -           | 212                        | -           | 249                                              | -                |
| BAY-16411 | 452                 | -           | 431                        | -           | 883                                              | -                |
| Total     | 5,146               | 15          | 4,647                      | 13          | 9,090                                            | 703              |

BLQ, below the limit of quantitation; PK, pharmacokinetic.

<sup>a</sup>Evaluable PK observations exclude BLQ observations and samples with no measured concentration.

<sup>b</sup>Study 13 only included participants 2 to <12 years of age: study 111 and 122 only included adolescents (11 to 18 years of age).

Note: Study 13 corresponds to PN013, Study 111 corresponds to PN026, and Study 122 corresponds to PN012.

**FIG A1.** Goodness-of-fit plots. CWRES, conditional weighted residuals; DV, dependent variable; IPRED, individual predicted concentration; IWRES, individual weighted residuals; PRED, population model predictions; TSLD, time since last dose.

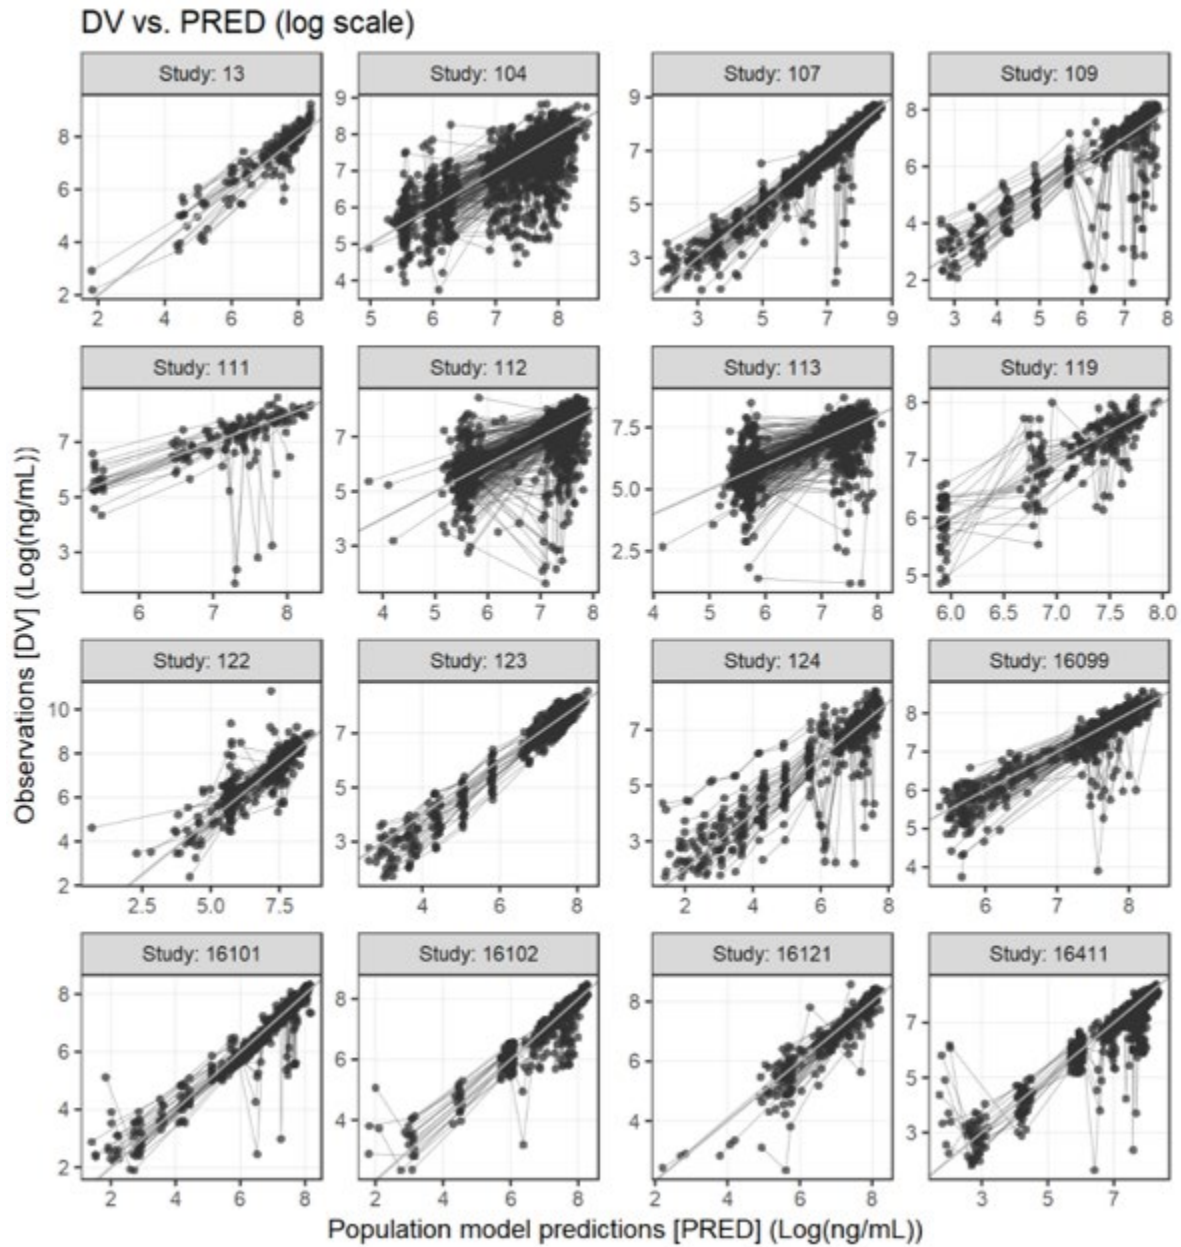

DV vs. IPRED (log scale)

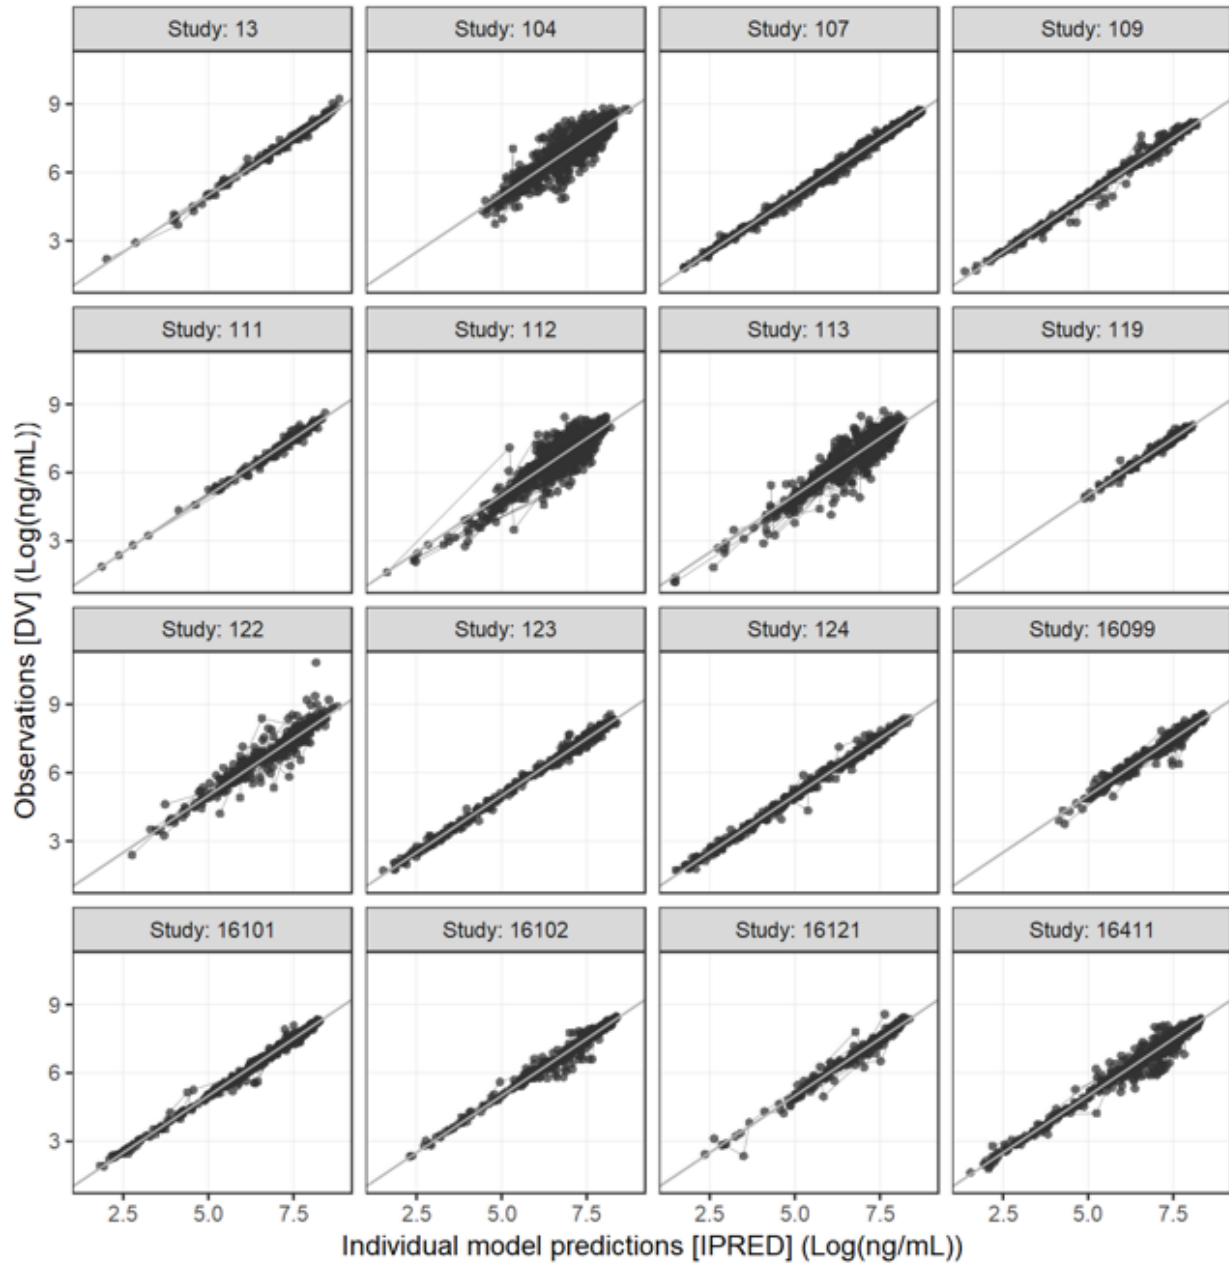



### CWRES vs. PRED (log scale)

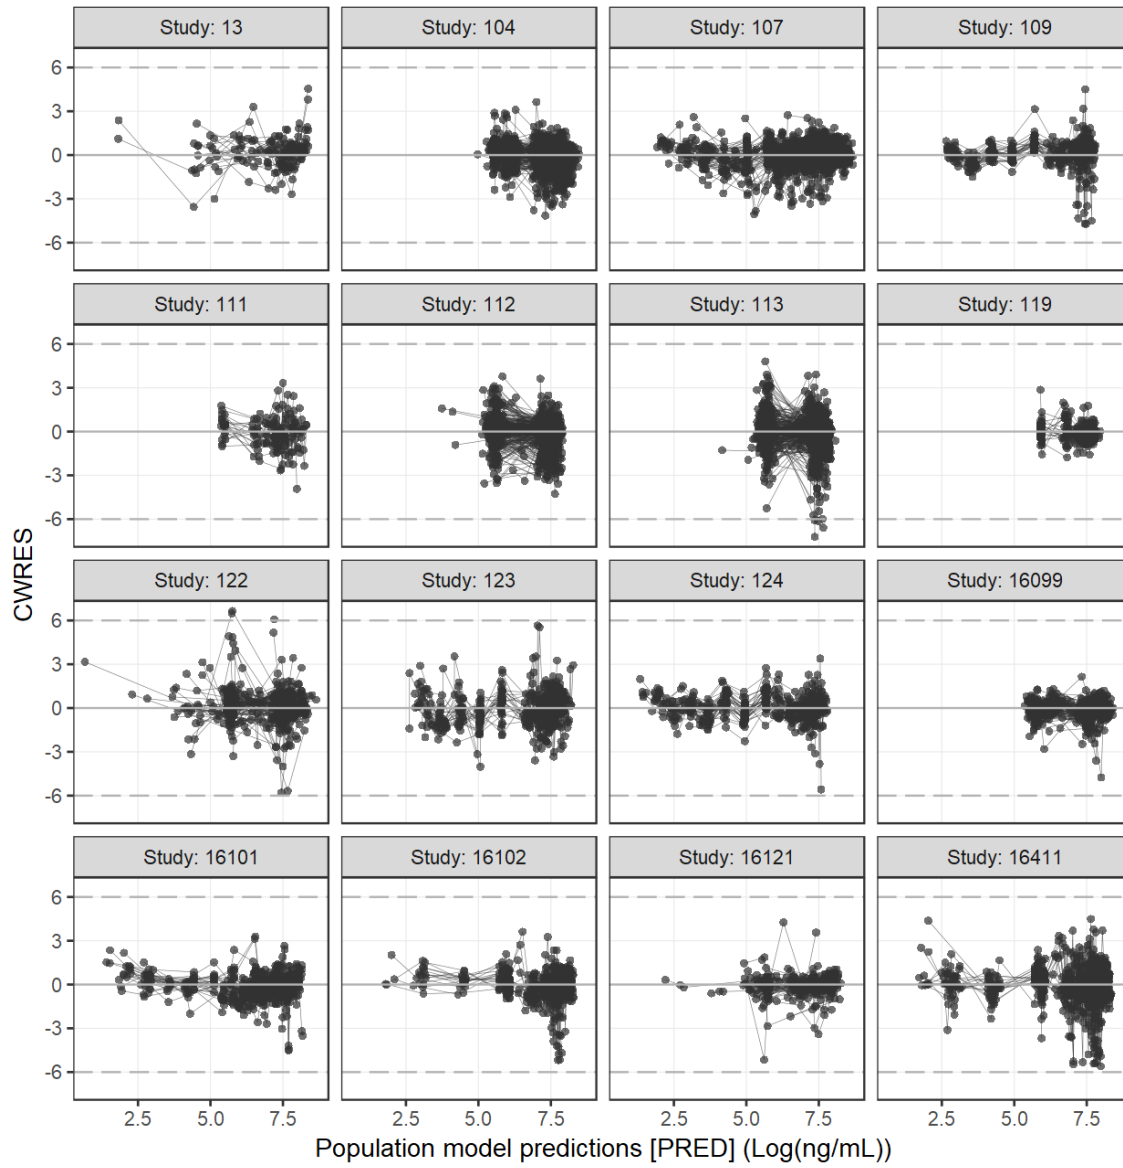

# CWRES vs. TSLD

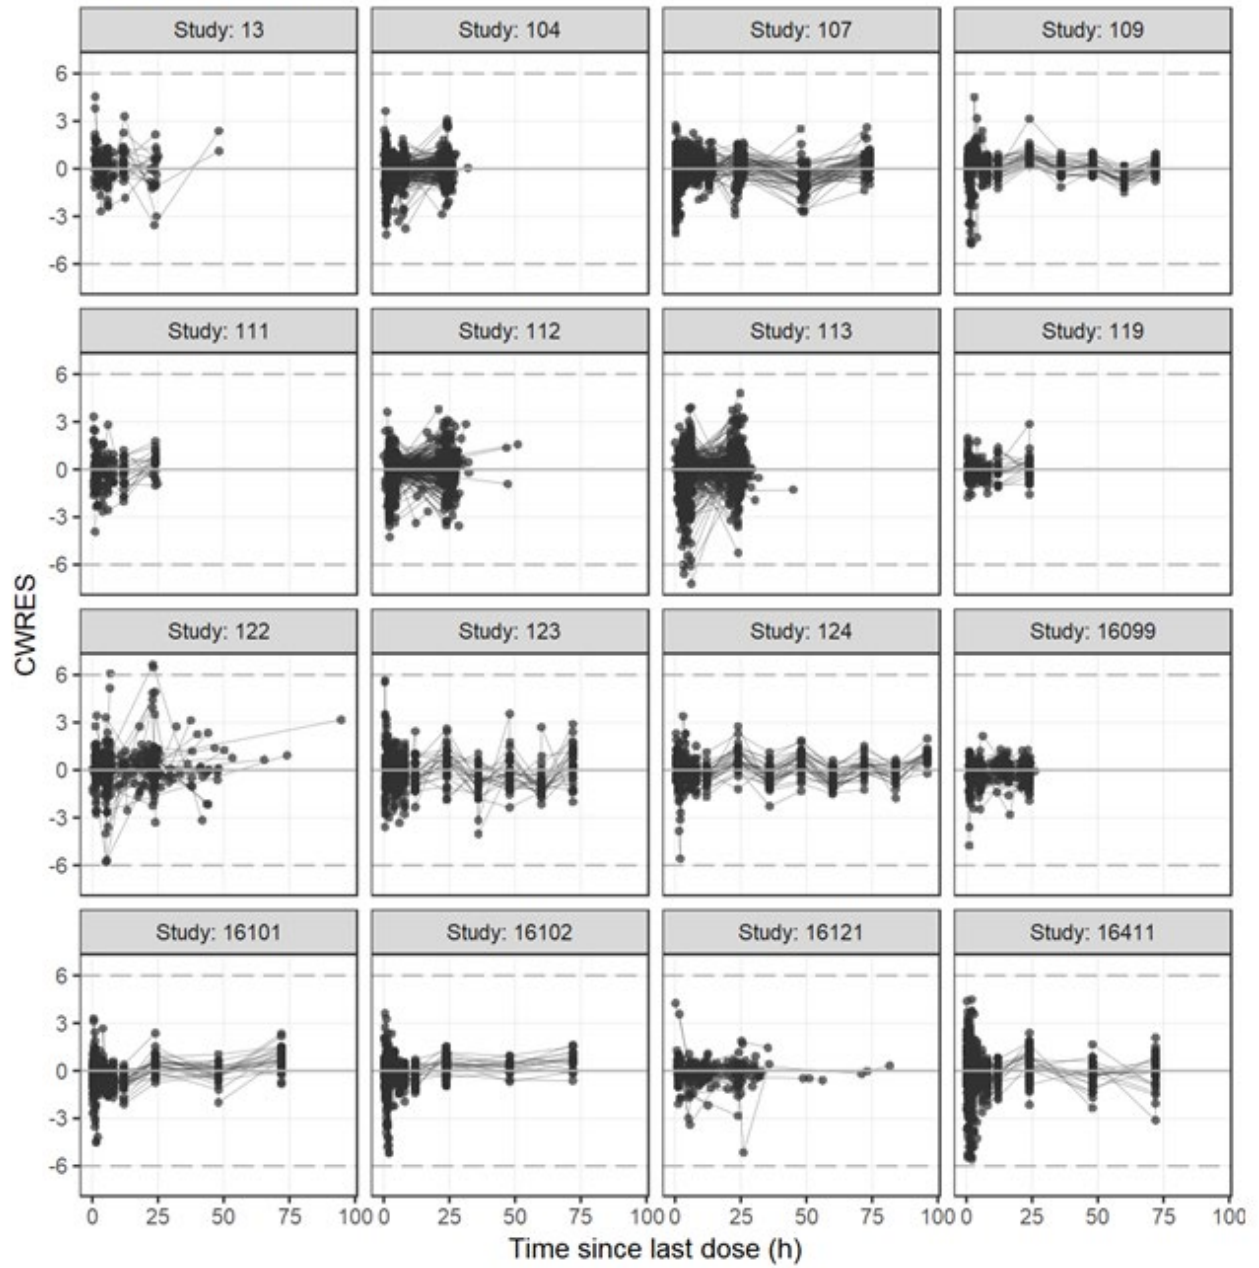

### ||IWRES| vs. IPRED (log scale)

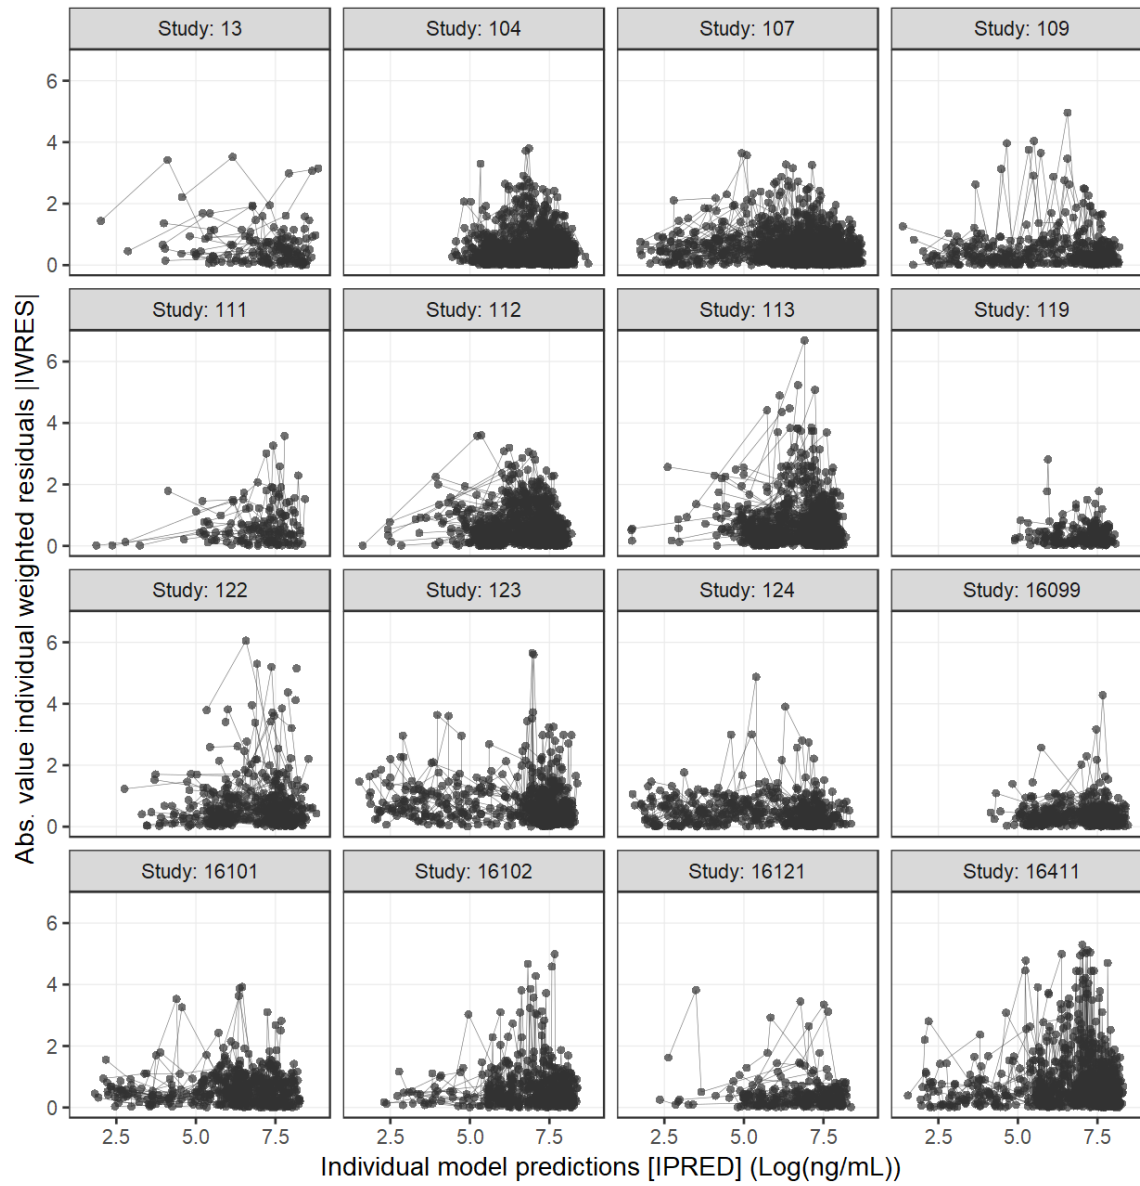

**FIG. A2.** Prediction-corrected VPC of the final model for all trials.

Note: Within each panel, the median (bold line) and 5<sup>th</sup> and 95<sup>th</sup> percentiles (dashed lines) of the observed data are compared to the 95% confidence intervals (shaded areas) for the median (dark area) and 5<sup>th</sup> and 95<sup>th</sup> percentiles of the simulated ( $n = 500$ ) data (light areas). Individual observations ( $n = 9,756$ ) are not shown for clarity. The lower limit of quantification was 5 ng/mL.

VPC, visual predictive check.

<sup>a</sup>Oral and IV administration or IV to oral switch permitted.

<sup>b</sup>Oral administration only.

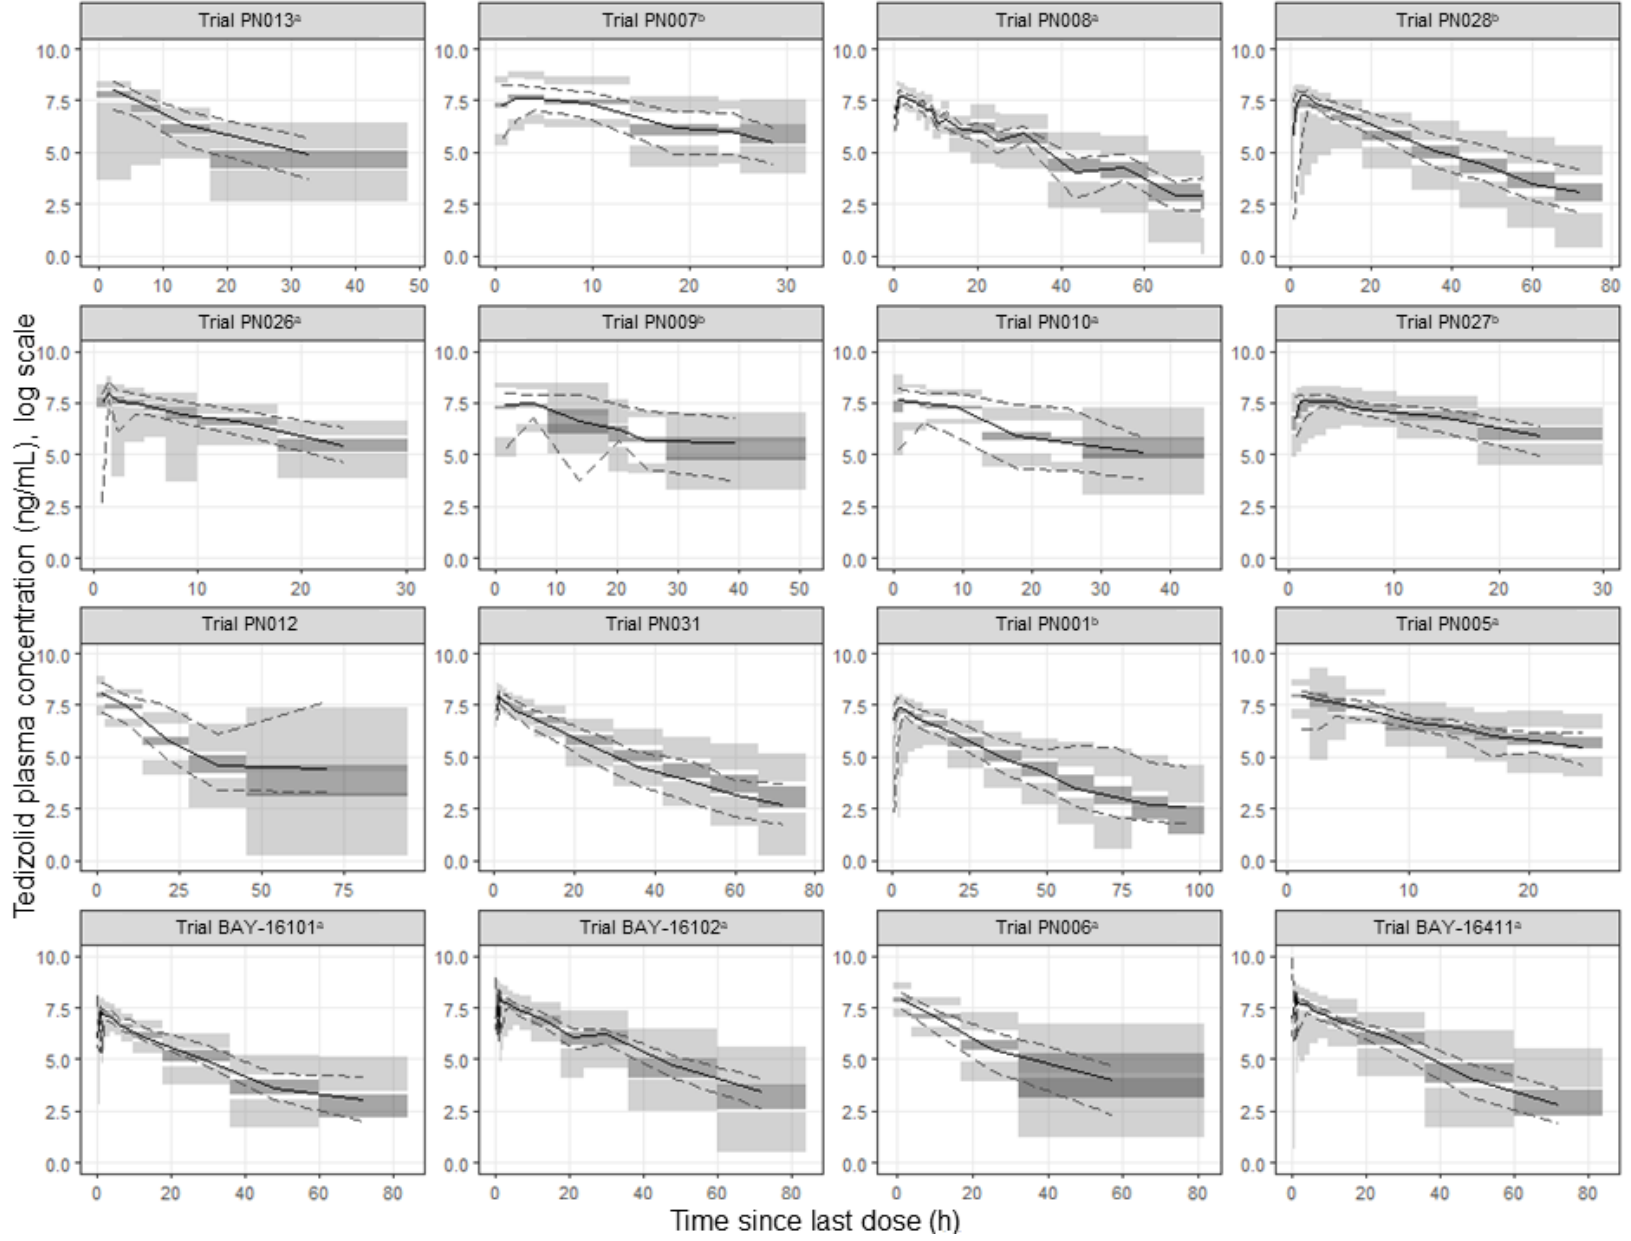

**FIG. A3.** Comparison of body weight distribution between simulated and actual adolescent participants.

Note: The simulated data were sampled from the National Health and Nutrition Examination Survey data set in participants 12 to <18 years of age; the observed data are participants in the phase 3 adolescent trial. The box is delimited by the 25th, 50th, and 75th percentiles; the whiskers extend to the lowest and largest values but no further than 1.5 times the interquartile range from the hinge. The dots beyond the whiskers are outliers and are represented individually. *n*, number of participants.

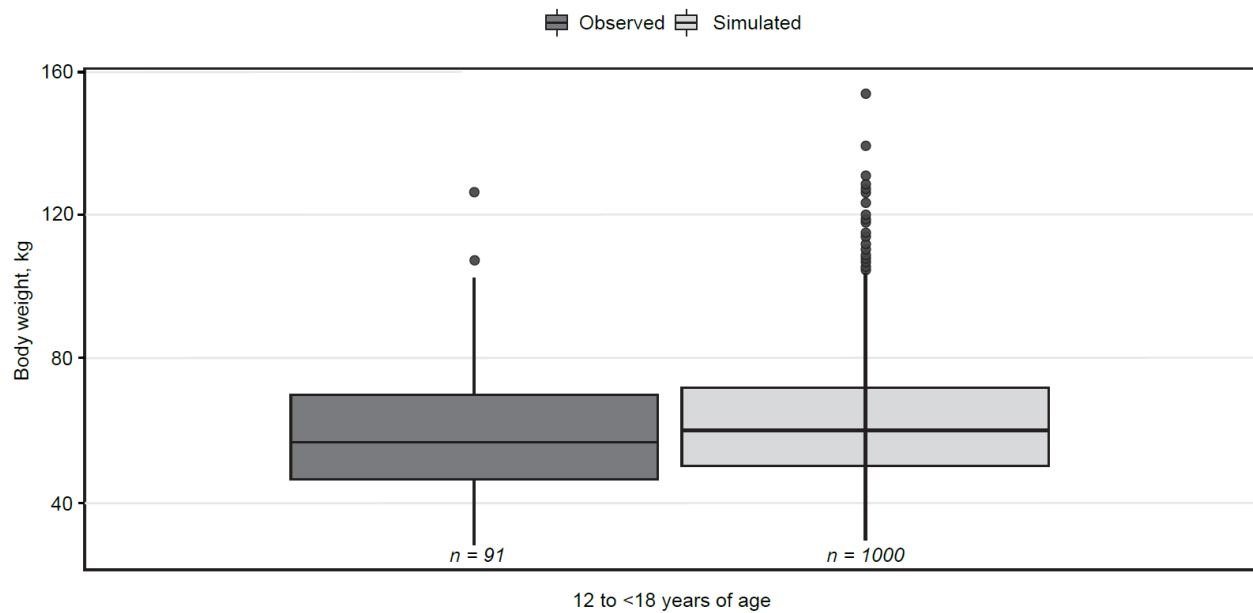

**FIG. A4.** Box plots of popPK model predicted AUC after last dose in adolescent (study PN012) and adult participants with ABSSSIs.

ABSSSI, acute bacterial skin and skin structure infection; AUC, area under the concentration-time curve;  $AUC_{0-24h\_last}$ , area under the concentration-time curve from 0 to 24 hours on the last dosing day; popPK, population pharmacokinetics.

Note: The adult population includes participant with ABSSSIs >18 years old receiving 200 mg of tedizolid phosphate from previous Phase 2 and 3 studies. The boxes are delimited by the 25th, 50th, and 75th percentiles; the whiskers extend to the lowest and largest values but no further than 1.5 times interquartile range from the hinge. The dots beyond the whiskers are outliers and are represented individually.

Linear scale

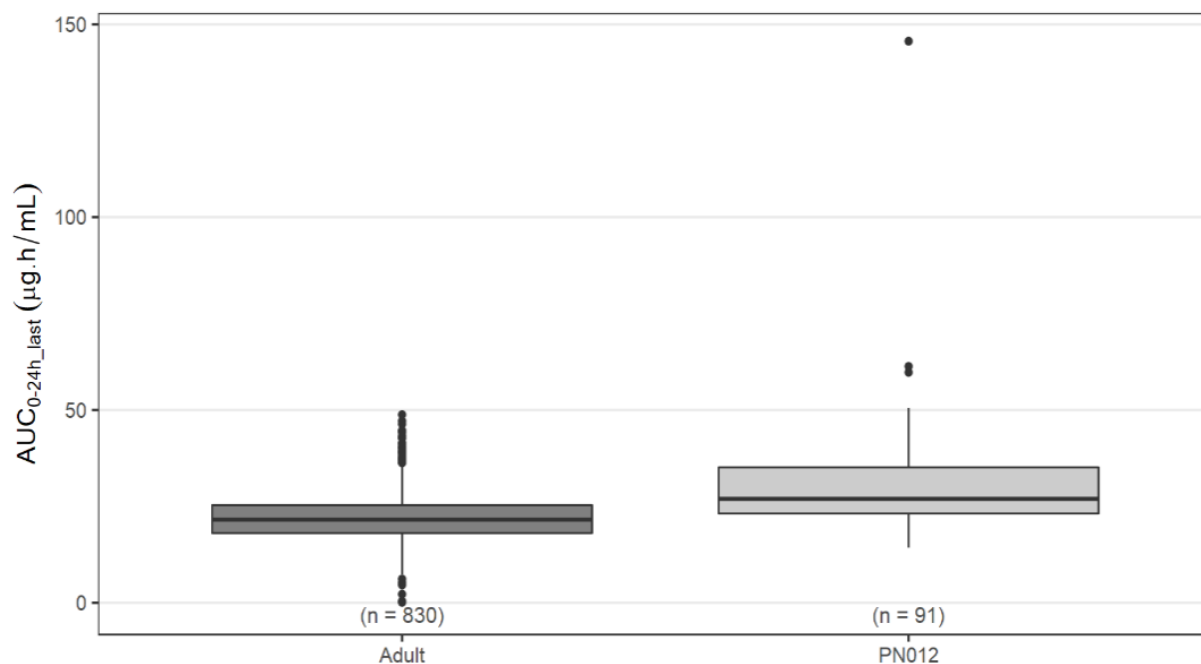

Logarithmic scale

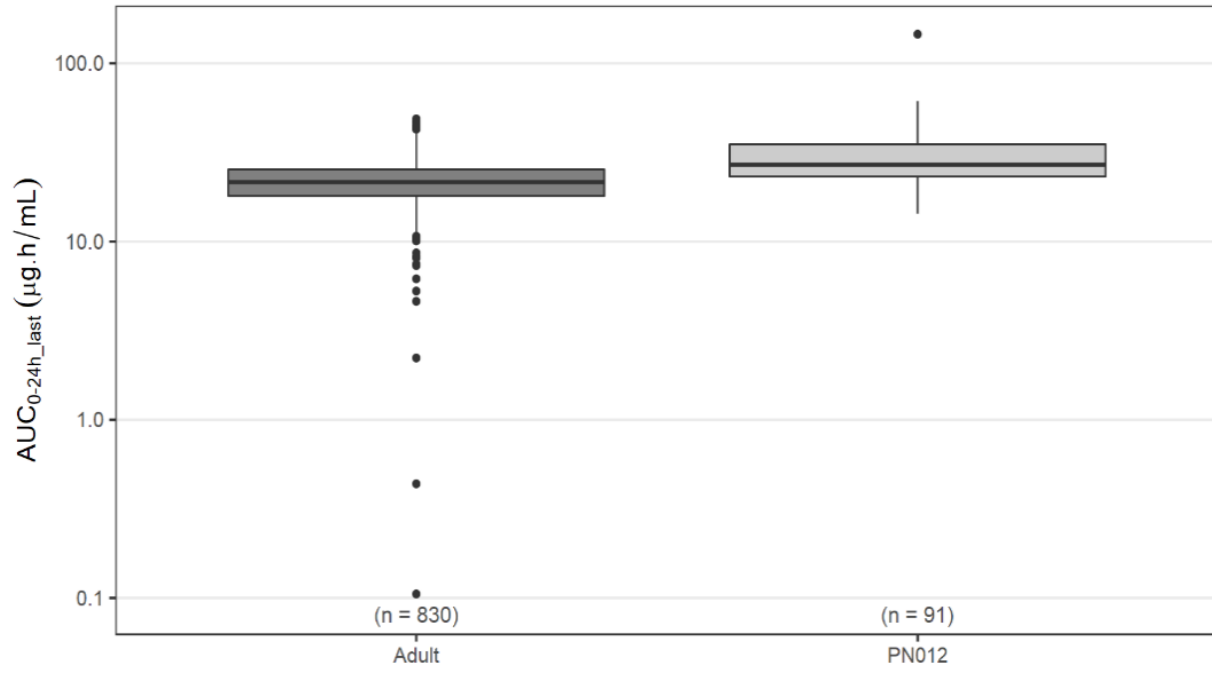

Supplement: aac.00895-21-s0001.pdf [file aac.00895-21-s0001.pdf]
